# Supplementary material
Source: Springer Nature journal article supplement (https://mijn.bsl.nl/resource/supplementary/13047_2012_487_MOESM3_ESM.pdf/7112600)

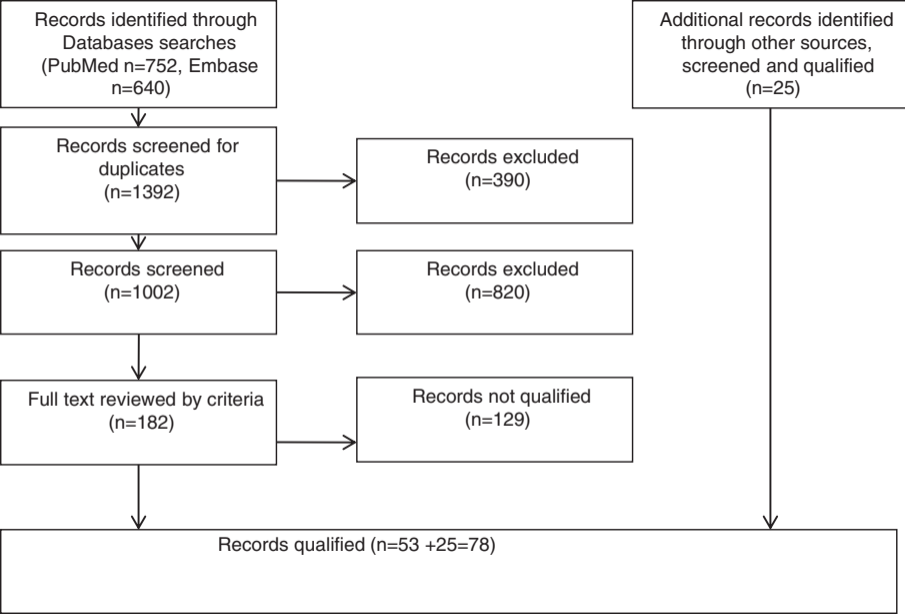

Supplement: MOESM3 [file 7112600]
